# Supplementary material for: Insight into the nature of the CRP–coronary event association using Mendelian randomization
Source: Oxford University Press journal article supplement (doi:10.1093/ije/dyl041), 2006-03-24
Supplement: dyl041_Supplementary_Data.zip [file dyl041_Supplementary_Data.zip]

Archive with 1 entries (1 files):
- dyl041_suppl_data.pdf
